# Supplementary material
Source: PubMed Central journal article supplement (PMC6980656)

**Data S3. NMR Spectra. Related to Figure 1**  
**NMR Spectra ZNL-02-012**

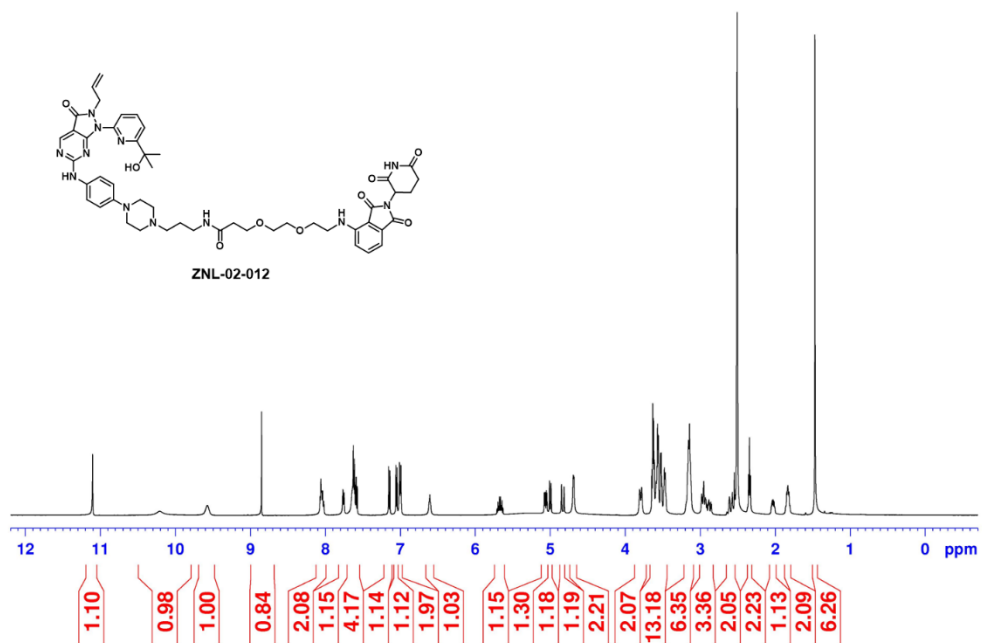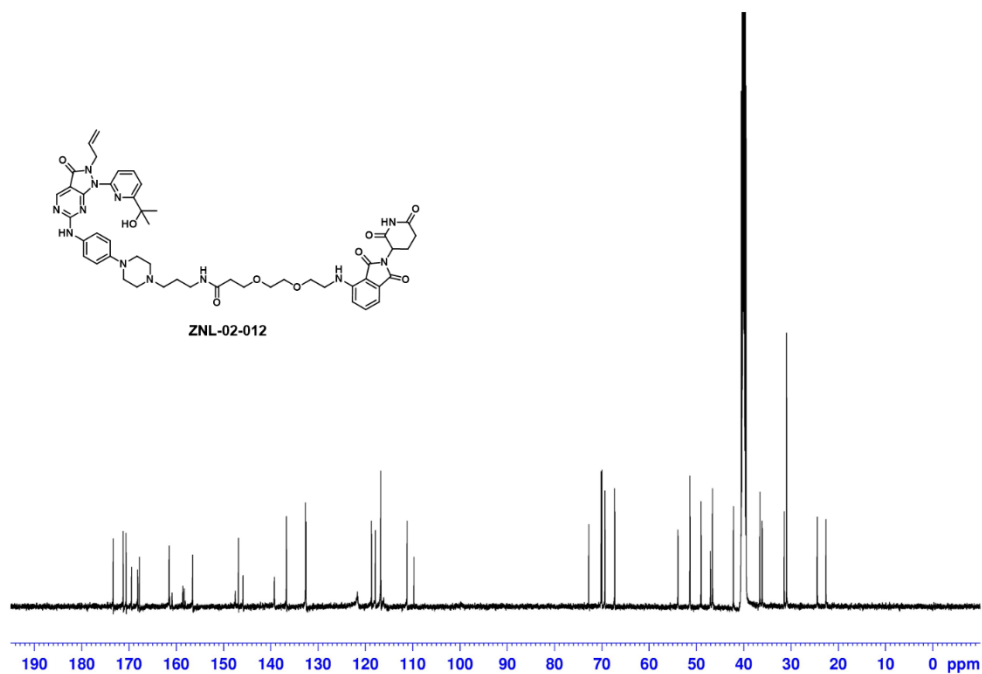

# NMR Spectra ZNL-02-047

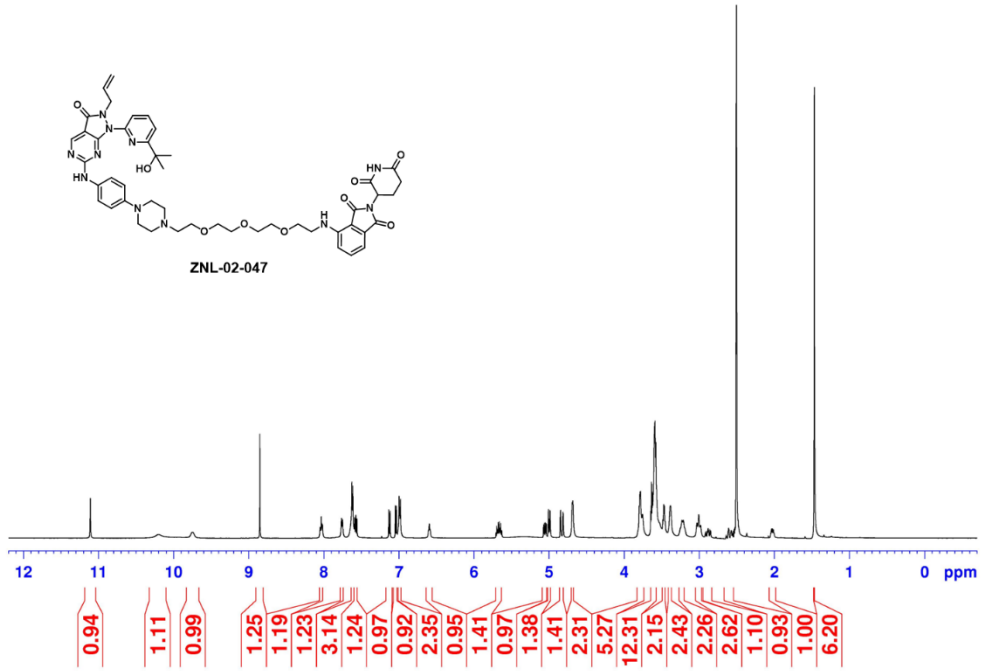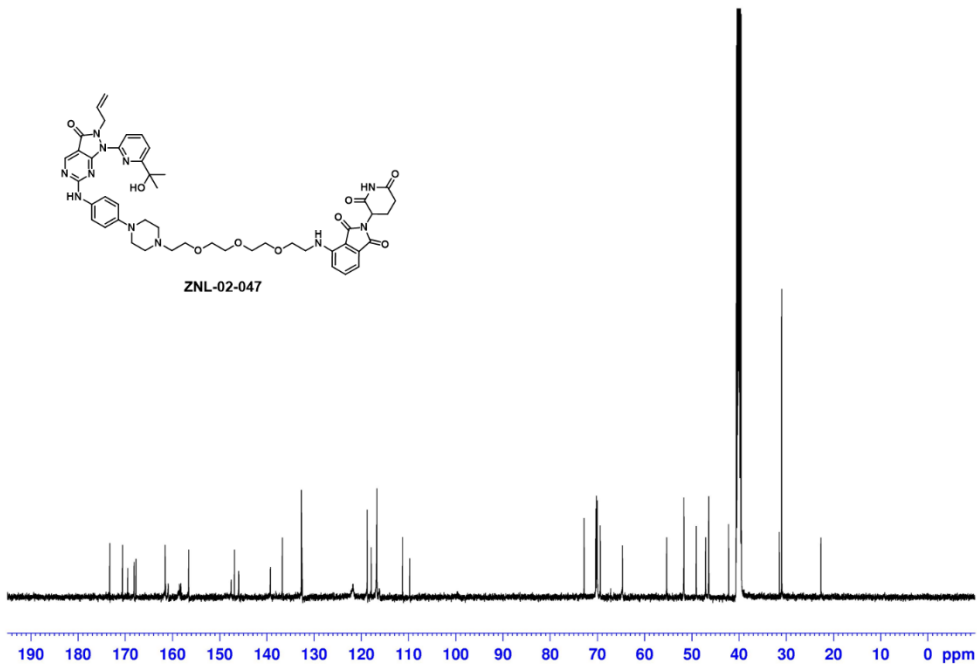

# NMR Spectra ZNL-02-040

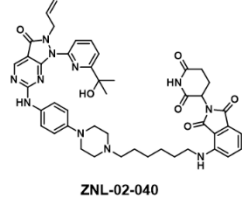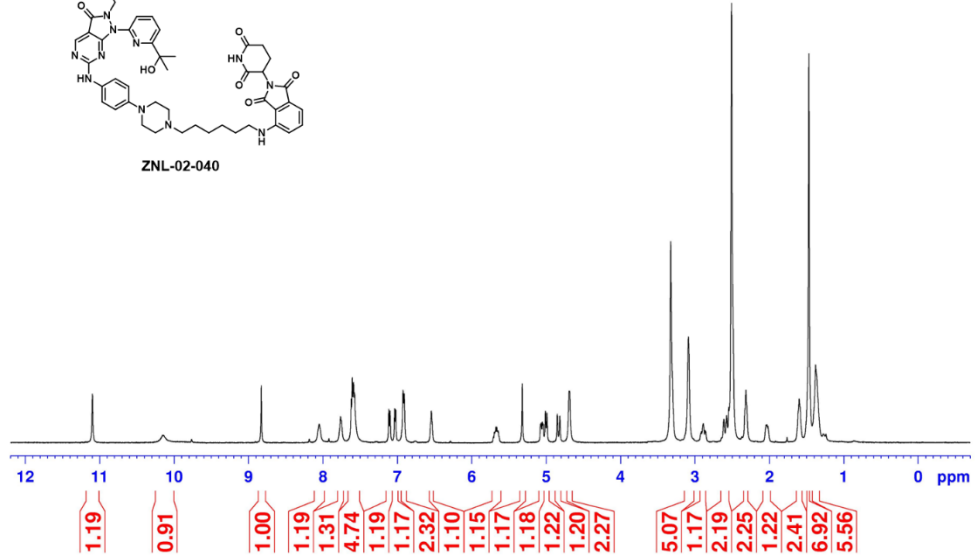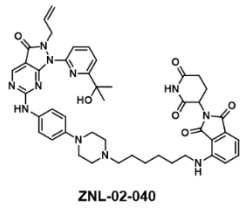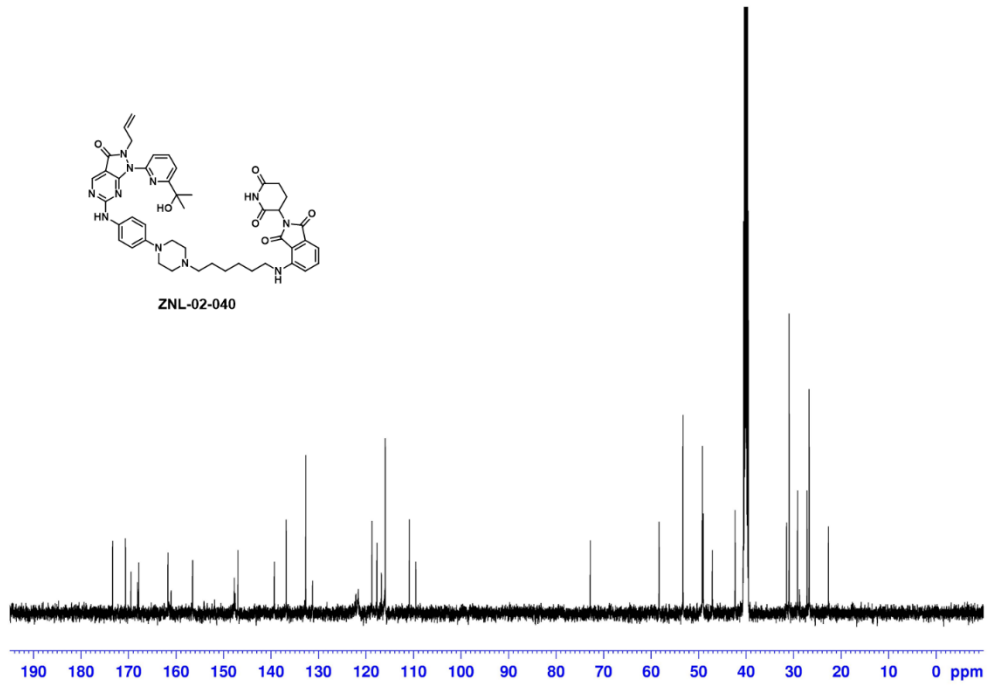

# NMR Spectra ZNL-02-096

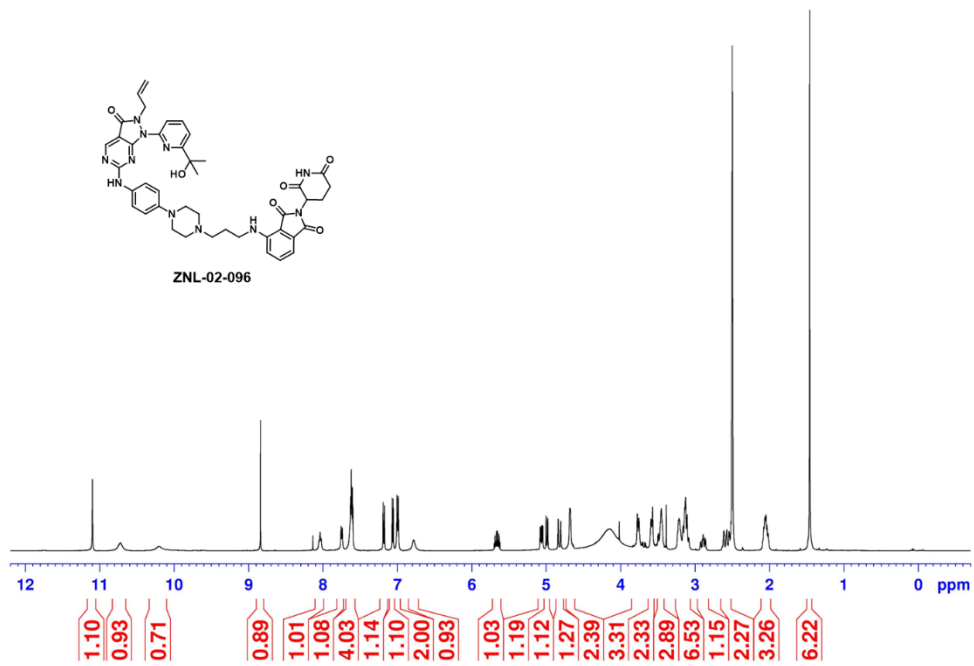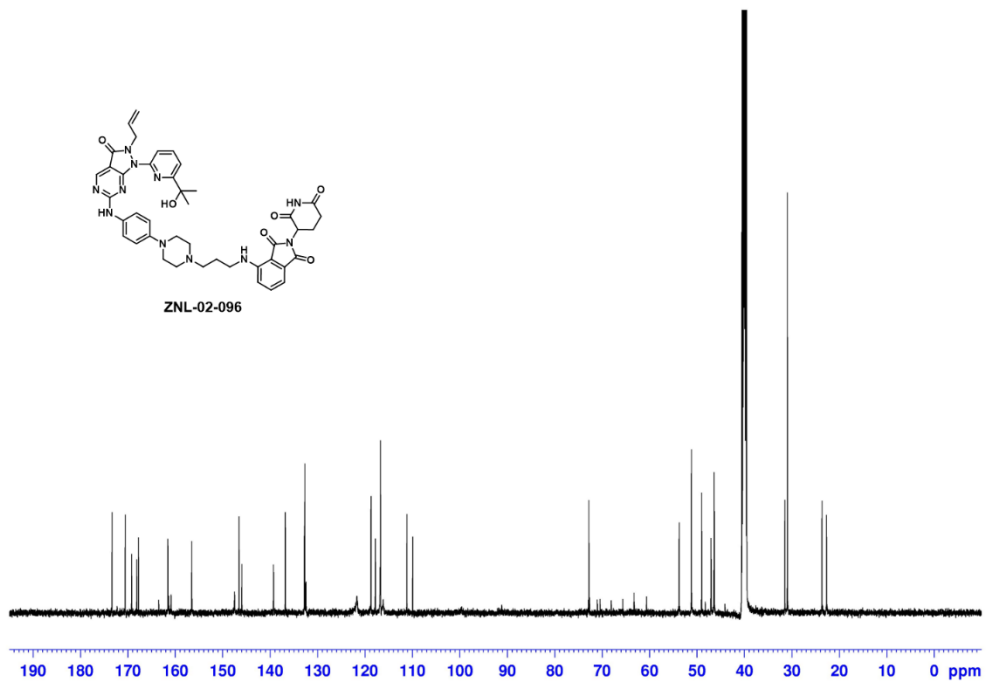

# NMR Spectra ZNL-02-178

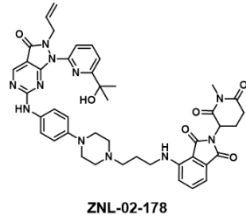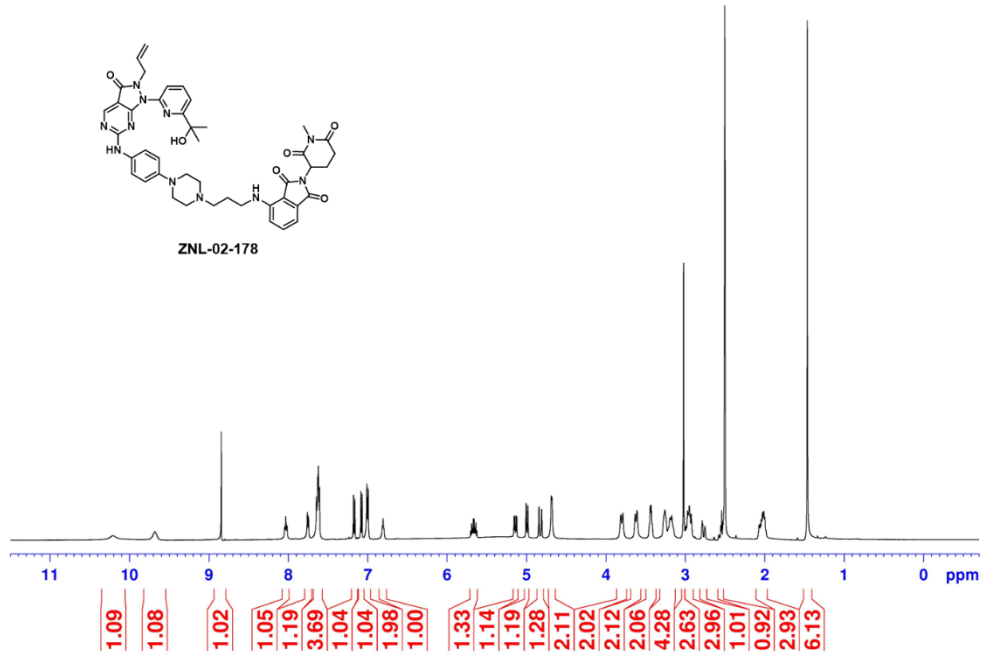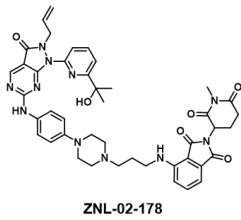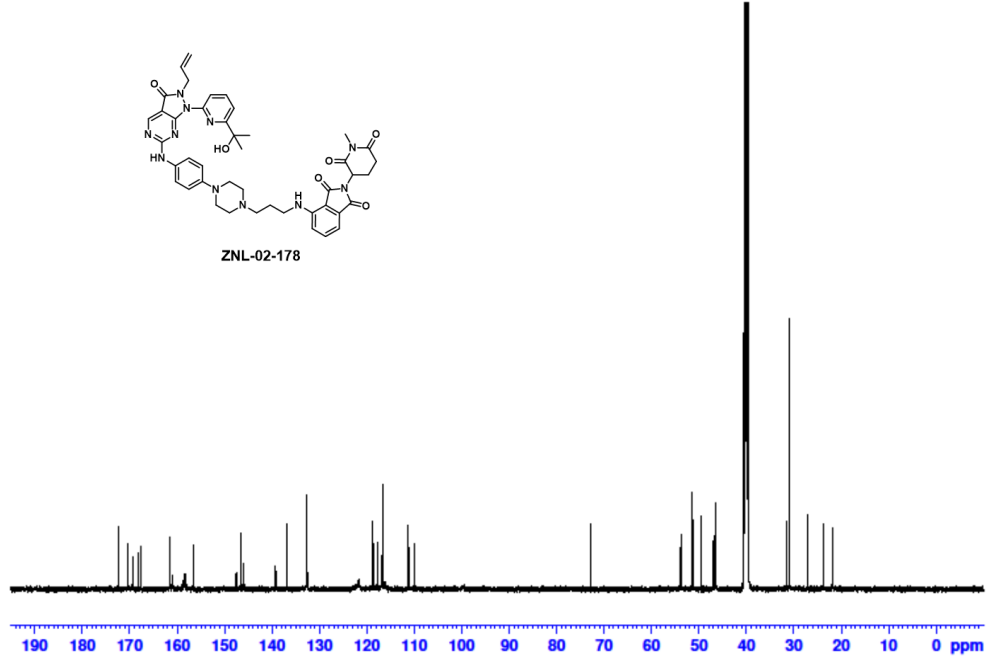

Supplement: NIHMS1543872-supplement-5.pdf [file NIHMS1543872-supplement-5.pdf]
